# Supplementary material for: Intersexual Differences in Behaviour and Resource Use of Specialist Phengaris teleius Butterflies
Source: MDPI journal article supplement (doi:10.3390/insects13030262), 2022-03-06
Supplement: s1 [file s1]

Supplementary Material 2

# Inter-sexual differences in behaviour and resource use of specialist *Phengaris teleius* butterflies

Miloš Popović <sup>1,2</sup>, Ana Golubović <sup>3</sup> and Piotr Nowicki <sup>1</sup>

<sup>1</sup> Institute of Environmental Sciences, Jagiellonian University, Gronostajowa 7, 30-387 Kraków, Poland

<sup>2</sup> Department of Biology and Ecology, Faculty of Sciences and Mathematics, University of Niš, Višegradska 33, 18000 Niš, Serbia

<sup>3</sup> Institute of Zoology, Faculty of Biology, University of Belgrade, Studentski trg 16, 11000 Belgrade, Serbia

## 1. Butterfly Tracking Study

### 1.1. Average Flight Time

**Table S1.** Average time spent on flying recorded during the butterfly tracking study. Original model contained three explanatory variables: sex (females and males), locality (Selevenj and Ludaš) and mowing regime (mown and unmown meadow).

| Parameter estimates   | Estimate ± SE | Z value | P value        |
|-----------------------|---------------|---------|----------------|
| Intercept             | 2.307 ± 0.150 | 15.352  | < <b>0.001</b> |
| Sex (male)            | 0.577 ± 0.194 | 2.979   | <b>0.003</b>   |
| Estimates of response | Rate ± SE     |         |                |
| Females               | 10.0 ± 1.5    |         |                |
| Males                 | 17.9 ± 2.2    |         |                |
| Contrasts             | Ratio ± SE    | Z ratio | P value        |
| Females / Males       | 0.561 ± 0.109 | -2.979  | <b>0.003</b>   |

Statistically significant *P* values are shown in bold. Variance of the individual variation (random effect) was  $0.636 \pm 0.798$  based on 330 observations of 65 individuals. Poisson mixed model was fitted using *lme4*, while estimates of response and contrasts are calculated in *emmeans* package in R. AIC of the model was 4844.5. Other supported models include the sex + locality (AIC = 4844.8) and sex \* locality (AIC = 4845.0).

### 1.2. Average Interaction Time

**Table S2.** Average time spent on interactions during the butterfly tracking study. Original model contained two explanatory variables: sex (females and males) and locality (Selevenj and Ludaš).

| Parameter estimates   | Estimate ± SE  | Z value | P value        |
|-----------------------|----------------|---------|----------------|
| Intercept             | 2.252 ± 0.224  | 10.036  | < <b>0.001</b> |
| Sex (male)            | -0.780 ± 0.284 | -2.743  | <b>0.006</b>   |
| Estimates of response | Rate ± SE      |         |                |
| Females               | 9.51 ± 2.14    |         |                |
| Males                 | 4.36 ± 0.77    |         |                |
| Contrasts             | Ratio ± SE     | Z ratio | P value        |
| Females / Males       | 2.18 ± 0.62    | 2.734   | <b>0.006</b>   |

Statistically significant *P* values are shown in bold. Variance of the individual variation (random effect) was  $0.765 \pm 0.875$  based on 100 observations of 46 individuals. Poisson mixed model was fitted using *lme4*, while estimates of response and contrasts are calculated in *emmeans* package in R. AIC of the best model was 992.4 without support for more complex models.

**Table S3.** Average time spent on interactions during the butterfly tracking study. Original model included significant variables from Table S2 and an additional variable to differentiate interspecific (different species) and intraspecific (same species) interactions.

| <b>Parameter estimates</b>                              | <b>Estimate <math>\pm</math> SE</b> | <b>Z vlaue</b> | <b>P value</b>    |
|---------------------------------------------------------|-------------------------------------|----------------|-------------------|
| Intercept                                               | 0.582 $\pm$ 0.309                   | 1.887          | 0.059             |
| Interaction (intraspecific)                             | 1.303 $\pm$ 0.285                   | 4.577          | <b>&lt; 0.001</b> |
| <b>Estimates of response</b>                            | <b>Rate <math>\pm</math> SE</b>     |                |                   |
| Interspecific interactions                              | 1.79 $\pm$ 0.55                     |                |                   |
| Intraspecific interactions                              | 6.59 $\pm$ 1.12                     |                |                   |
| <b>Contrast</b>                                         | <b>Ratio <math>\pm</math> SE</b>    | <b>Z ratio</b> | <b>P value</b>    |
| Interspecific interactions / Intraspecific interactions | 0.272 $\pm$ 0.077                   | -4.577         | <b>&lt; 0.001</b> |

Statistically significant *P* values are shown in bold. Variance of the individual variation (random effect) was 0.960  $\pm$  0.980 based on 76 observations of 39 individuals. Poisson mixed model was fitted using *lme4*, while estimates of response and contrasts are calculated in *emmeans* package in R. AIC value for the model was 678.7.

**Table S4.** Comparison of average interspecific interaction times for individuals of the same sexes in contrast to individuals of different sexes.

| <b>Parameter estimates</b> | <b>Estimate <math>\pm</math> SE</b> | <b>Z vlaue</b> | <b>P value</b>    |
|----------------------------|-------------------------------------|----------------|-------------------|
| Intercept                  | 2.401 $\pm$ 0.202                   | 11.859         | <b>&lt; 0.001</b> |
| Same sex                   | -1.109 $\pm$ 0.198                  | -5.594         | <b>&lt; 0.001</b> |
| <b>Estimates</b>           | <b>Rate <math>\pm</math> SE</b>     |                |                   |
| Different sex              | 11.03 $\pm$ 2.23                    |                |                   |
| Same sex                   | 3.64 $\pm$ 0.78                     |                |                   |
| <b>Contrast</b>            | <b>Ratio <math>\pm</math> SE</b>    | <b>Z ratio</b> | <b>P value</b>    |
| Different sex / Same sex   | 3.03 $\pm$ 0.60                     | 5.594          | <b>&lt; 0.001</b> |

Statistically significant *P* values are shown in bold. Variance of the individual variation (random effect) was 0.944  $\pm$  0.972 based on 58 observations of 32 individuals. Poisson mixed model was fitted using *lme4*, while estimates of response and contrasts are calculated in *emmeans* package in R. AIC value for the model was 562.2.

### 1.3. Average Feeding Time

**Table S5.** Average time that *Phengaris teleius* butterflies spent on feeding during the tracking study. Original model contained three explanatory variables: plant (*Sanguisorba officinalis* and other Asteraceae plants), sex (females and males) and locality (Selevenj and Ludaš).

| Parameter estimates                  | Estimate       | Z value | P value        |
|--------------------------------------|----------------|---------|----------------|
| Intercept                            | 2.904 ± 0.195  | 14.922  | < <b>0.001</b> |
| Plant (Asteraceae)                   | 1.466 ± 0.245  | 5.978   | < <b>0.001</b> |
| Sex (male)                           | -0.382 ± 0.285 | -1.338  | 0.181          |
| Interaction term (Asteraceae × male) | -0.448 ± 0.226 | -1.981  | 0.055          |

  

| Estimates of response            | Rate ± SE    |
|----------------------------------|--------------|
| Females on <i>S. officinalis</i> | 18.2 ± 3.55  |
| Females on Asteraceae plants     | 79.0 ± 21.14 |
| Males on <i>S. officinalis</i>   | 12.5 ± 2.61  |
| Males on Asteraceae plants       | 31.4 ± 6.59  |

  

| Contrasts                                                         | Ratio ± SE    | Z ratio | P value        |
|-------------------------------------------------------------------|---------------|---------|----------------|
| Females on <i>S. officinalis</i> / Female on Asteraceae           | 0.231 ± 0.056 | -5.978  | < <b>0.001</b> |
| Females on <i>S. officinalis</i> / Males on <i>S. officinalis</i> | 1.465 ± 0.418 | 1.338   | 0.538          |
| Females on <i>S. officinalis</i> / Males on Asteraceae            | 0.581 ± 0.166 | -1.906  | 0.226          |
| Females on Asteraceae / Males on <i>S. officinalis</i>            | 6.346 ± 2.163 | 5.421   | < <b>0.001</b> |
| Females on Asteraceae / Males on Asteraceae                       | 2.516 ± 0.860 | 2.698   | <b>0.035</b>   |
| Males on <i>S. officinalis</i> / Males on Asteraceae              | 0.396 ± 0.054 | -6.809  | < <b>0.001</b> |

Statistically significant *P* values are shown in bold. Variance of the individual variation (random effect) was 0.739 ± 0.859 based on 116 observation of 42 individuals. Poisson mixed model was fitted using *lme4*, while estimates of response and contrasts are calculated in *emmeans* package in R. AIC of the best model was 1661.8. Other supported models included plant \* locality + sex (AIC = 1663.4), plant + sex (AIC = 1663.6) and plant \* sex + locality (AIC = 1663.8).

#### 1.4. Average Resting Time

**Table S6.** Average time spent on resting during the tracking study. Original model contained two explanatory variables: sex (females and males) and locality (Selevenj and Ludaš).

| Parameter estimates                       | Estimate $\pm$ SE  | Z value | P value        |
|-------------------------------------------|--------------------|---------|----------------|
| Intercept                                 | 1.819 $\pm$ 0.435  | 4.196   | < <b>0.001</b> |
| Sex (male)                                | -0.648 $\pm$ 0.680 | -0.952  | 0.341          |
| Locality (Selevenj)                       | -0.129 $\pm$ 0.513 | -0.252  | 0.801          |
| Interaction term (male $\times$ Selevenj) | 1.482 $\pm$ 0.822  | 1.802   | 0.072          |
| Estimates of response                     | Rate $\pm$ SE      |         |                |
| Females at Ludaš Lake                     | 6.16 $\pm$ 2.67    |         |                |
| Females at Selevenj Sand                  | 5.42 $\pm$ 1.49    |         |                |
| Males at Ludaš Lake                       | 3.23 $\pm$ 1.69    |         |                |
| Males at Selevenj Sand                    | 12.47 $\pm$ 4.63   |         |                |
| Contrasts                                 | Ratio $\pm$ SE     | Z ratio | P value        |
| Females at Ludaš / Females at Selevenj    | 1.138 $\pm$ 0.584  | 0.252   | 0.994          |
| Females at Ludaš / Males at Ludaš         | 1.911 $\pm$ 1.300  | 0.952   | 0.777          |
| Females at Ludaš / Males at Selevenj      | 0.494 $\pm$ 0.282  | -1.235  | 0.605          |
| Females at Selevenj / Males at Ludaš      | 1.679 $\pm$ 0.995  | 0.875   | 0.818          |
| Females at Selevenj / Males at Selevenj   | 0.434 $\pm$ 0.201  | -1.804  | 0.271          |
| Males at Ludaš / Males at Selevenj        | 0.259 $\pm$ 0.166  | -2.104  | 0.152          |

Statistically significant *P* values are shown in bold. Variance of the individual variation (random effect) was  $1.192 \pm 1.092$  based on 111 observations of 38 individuals. Poisson mixed model was fitted using *lme4*, while estimates of response and contrasts are calculated in *emmeans* package in R. AIC of the selected model and model that included locality as a sole predictor was 1485.5. Other supported model include sex (AIC = 1485.8) and sex + locality (AIC = 1486.6).

## 2. Mark Release Recapture Study

### 2.1. Intersexual Differences in Plant Preferences

**Table S7.** Intersexual differences in feeding plants of *Phengaris teleius* grouped in three classes based on phylogeny and sample size.

| Parameter estimates                           | Estimate $\pm$ SE    | Z value | P value      |
|-----------------------------------------------|----------------------|---------|--------------|
| Asteraceae                                    | 0.308 $\pm$ 0.219    | 1.404   | 0.160        |
| Other plants                                  | 0.693 $\pm$ 0.327    | 2.118   | <b>0.034</b> |
| <i>Sanguisorba officinalis</i>                | -0.383 $\pm$ 0.117   | -3.265  | <b>0.001</b> |
| Estimates of response                         | Probability $\pm$ SE |         |              |
| Asteraceae                                    | 0.576 $\pm$ 0.054    |         |              |
| Other plants                                  | 0.667 $\pm$ 0.073    |         |              |
| <i>Sanguisorba officinalis</i>                | 0.405 $\pm$ 0.028    |         |              |
| Contrasts                                     | Odds ratio $\pm$ SE  | Z ratio | P value      |
| Asteraceae / Other plants                     | 0.681 $\pm$ 0.268    | -0.976  | 0.592        |
| Asteraceae / <i>Sanguisorba officinalis</i>   | 1.997 $\pm$ 0.497    | 2.778   | <b>0.015</b> |
| Other plants / <i>Sanguisorba officinalis</i> | 2.934 $\pm$ 1.020    | 3.096   | <b>0.006</b> |

Statistically significant *P* values are shown in bold. GLM binomial model was fitted using R base function, while estimates of response and contrasts are calculated in *emmeans* package.

**Table S8.** Intersexual differences in resting plants of *Phengaris teleius* grouped in four classes based on phylogeny and sample size.

| Coefficients                                  | Estimate             | Z value | P value           |
|-----------------------------------------------|----------------------|---------|-------------------|
| Asteraceae                                    | 0.257 $\pm$ 0.139    | 1.854   | 0.064             |
| Other plants                                  | 0.069 $\pm$ 0.166    | 4.150   | 0.678             |
| Poales                                        | 0.376 $\pm$ 0.121    | 3.121   | <b>0.002</b>      |
| <i>Sanguisorba officinalis</i>                | -0.411 $\pm$ 0.086   | -4.796  | <b>&lt; 0.001</b> |
| Estimates                                     | Probability estimate |         |                   |
| Asteraceae                                    | 0.564 $\pm$ 0.034    |         |                   |
| Other plants                                  | 0.517 $\pm$ 0.041    |         |                   |
| Poales                                        | 0.593 $\pm$ 0.029    |         |                   |
| <i>Sanguisorba officinalis</i>                | 0.399 $\pm$ 0.021    |         |                   |
| Contrasts                                     | Odds ration          | Z ratio | P value           |
| Asteraceae / Other plants                     | 1.207 $\pm$ 0.261    | 8.700   | 0.821             |
| Asteraceae / Poales                           | 0.888 $\pm$ 0.163    | -6.470  | 0.917             |
| Asteraceae / <i>Sanguisorba officinalis</i>   | 1.952 $\pm$ 0.318    | 4.098   | <b>&lt; 0.001</b> |
| Other plants / Poales                         | 0.735 $\pm$ 0.151    | -1.497  | 0.439             |
| Other plants / <i>Sanguisorba officinalis</i> | 1.617 $\pm$ 0.302    | 2.568   | <b>0.050</b>      |
| Poales / <i>Sanguisorba officinalis</i>       | 2.198 $\pm$ 0.325    | 5.323   | <b>&lt; 0.001</b> |

Statistically significant *P* values are shown in bold. GLM binomial model was fitted using R base function, while estimates of response and contrasts are calculated in *emmeans* package.

### 3. Overview of the Plant Usage

**Table S9.** The list of plant species and other objects used by *Phengaris teleius* butterflies for feeding and resting, with percentages of their use shown.

| Plant/object                        | Mark-release-recapture |          |          |          | Butterfly tracking study |          |          |          |
|-------------------------------------|------------------------|----------|----------|----------|--------------------------|----------|----------|----------|
|                                     | Females                |          | Males    |          | Females                  |          | Males    |          |
|                                     | Feed (%)               | Rest (%) | Feed (%) | Rest (%) | Feed (%)                 | Rest (%) | Feed (%) | Rest (%) |
| <i>Sanguisorba officinalis</i>      | 77.83                  | 53.90    | 61.31    | 36.78    | 90.11                    | 70.43    | 43.66    | 40.48    |
| <i>Serratula tinctoria</i>          | 14.78                  | 7.95     | 18.59    | 11.00    | 8.79                     | 11.30    | 43.66    | 52.38    |
| <i>Epilobium</i> sp.                | 3.39                   | 0.48     | 3.52     | 2.30     |                          |          |          |          |
| <i>Knautia integrifolia</i>         | 0.43                   |          | 4.02     | 0.33     |                          |          |          |          |
| <i>Centaurea jacea</i>              | 0.43                   | 4.61     | 2.51     | 6.08     |                          | 3.48     | 12.68    |          |
| <i>Stenactis annua</i>              | 0.43                   | 0.79     | 2.51     | 0.66     |                          |          |          |          |
| <i>Viccia cracca</i>                | 0.43                   | 0.16     | 2.01     | 0.16     |                          |          |          |          |
| <i>Trifolium pratensis</i>          |                        |          | 1.51     | 0.16     |                          |          |          |          |
| Fabaceae                            | 0.43                   |          | 0.50     |          |                          |          |          |          |
| <i>Campanula glomerata</i>          | 0.43                   |          | 0.50     |          |                          |          |          |          |
| <i>Achillea asplenifolia</i>        |                        | 0.64     | 1.01     | 1.31     | 1.10                     |          |          | 4.76     |
| <i>Plantago maritima</i>            | 0.43                   | 1.91     | 0.50     | 2.46     |                          | 2.61     |          |          |
| <i>Plantago lanceolata</i>          |                        |          | 0.50     |          |                          |          |          |          |
| <i>Stachis palustris</i>            |                        |          | 0.50     |          |                          |          |          |          |
| <i>Lathyrus tuberosus</i>           |                        |          | 0.50     |          |                          |          |          |          |
| Snail shell                         | 0.43                   | 1.59     |          | 3.28     |                          |          |          |          |
| <i>Lotus corniculatus</i>           |                        |          |          |          |                          |          |          |          |
| Poaceae                             |                        | 8.43     |          | 13.63    |                          | 5.22     |          | 2.38     |
| <i>Mollinia</i> sp.                 |                        | 7.15     |          | 10.67    |                          |          |          |          |
| <i>Festuca ovina</i>                |                        |          |          |          |                          |          |          |          |
| <i>Phragmites communis</i>          |                        | 1.27     |          | 1.15     |                          |          |          |          |
| <i>Carex</i> sp.                    |                        | 0.16     |          | 0.16     |                          | 0.87     |          |          |
| <i>Genista tinctoria</i>            |                        | 0.16     |          | 0.33     |                          |          |          |          |
| <i>Galium verum</i>                 |                        | 3.18     |          | 3.12     |                          |          |          |          |
| <i>Equisetum</i> sp.                |                        | 2.07     |          | 1.64     |                          | 0.87     |          |          |
| <i>Holoschoenus vulgaris</i>        |                        | 1.27     |          | 1.15     |                          |          |          |          |
| <i>Silene vulgaris</i>              |                        | 0.64     |          | 0.49     |                          |          |          |          |
| <i>Ononis spinosa</i>               |                        | 1.75     |          | 0.66     |                          | 0.87     |          |          |
| <i>Linum perenne/austriacum</i>     |                        | 0.16     |          |          |                          |          |          |          |
| <i>Cirsium canum</i>                |                        |          |          | 0.16     |                          |          |          |          |
| <i>Prunella officinalis</i>         |                        |          |          | 0.33     |                          |          |          |          |
| Other Compositae                    |                        | 0.32     |          |          |                          |          |          |          |
| <i>Cichorium intybus</i>            |                        | 0.32     |          |          |                          | 2.61     |          |          |
| <i>Salvia</i> sp.                   |                        | 0.16     |          |          |                          |          |          |          |
| Apiaceae                            |                        | 0.16     |          | 0.33     |                          |          |          |          |
| <i>Lepidium cartilagineum</i>       |                        |          |          |          |                          |          |          |          |
| <i>Medicago sativa</i>              |                        |          |          |          |                          |          |          |          |
| Dry plant organs                    |                        | 0.64     |          | 0.81     |                          | 1.74     |          |          |
| <i>Sanguisorba officinalis</i> leaf |                        | 0.16     |          | 0.33     |                          |          |          |          |
